# Supplementary material for: Type-II BiVO4/Ni3(hexahydroxytriphenylene)2 heterojunction photoanodes for effective photoelectrochemical reaction
Source: Royal Society of Chemistry journal article supplement (doi:10.1039/d2ya00008c), 2022-01-01
Supplement: d2ya00008c1.pdf [file d2ya00008c1.pdf]

## Supplementary materials

### **Type-II BiVO<sub>4</sub>/Ni<sub>3</sub>(hexahydroxytriphenylene)<sub>2</sub> heterojunction photoanodes for effective photoelectrochemical reaction**

Ji Won Yoon, Young-Moo Jo, Jong-Heun Lee\*

Department of Materials Science and Engineering, Korea University, Seoul 02841, Republic of Korea

\*Corresponding author. *E-mail address: jongheun@korea.ac.kr* (Jong-Heun Lee)

### *Material characterization*

Morphological and structural characterizations of the BiVO<sub>4</sub> film and BiVO<sub>4</sub>/M<sub>3</sub>(HHTP)<sub>2</sub> (M = Ni, Co, Cu) were conducted using a field-emission scanning electron microscope (FE-SEM, SU-70) with an acceleration voltage of 5–10 kV and TEM (JEM-F200, JEOL Ltd, Japan). The phase and crystal structure of the BiVO<sub>4</sub> film and BiVO<sub>4</sub>/M<sub>3</sub>(HHTP)<sub>2</sub> (M = Ni, Co, Cu) were investigated via XRD (D/MAX-2500V/PC, Rigaku, Japan; CuK $\alpha$ ,  $\lambda=1.5418$  Å). The atomic compositions of the BiVO<sub>4</sub>/M<sub>3</sub>(HHTP)<sub>2</sub> (M = Ni, Co, Cu) were analyzed by XPS (X-TOOL, ULVAC-PHI, monochromatic Al-K $\alpha$  = 1486.6 eV, Ag 3d<sub>5/2</sub> < 0.48 eV). The reflection (R) and transmission (T) of the photoanodes were obtained using UV-vis spectroscopy (UV-vis, Jasco V-650). The band-bending diagrams of the BiVO<sub>4</sub>/M<sub>3</sub>(HHTP)<sub>2</sub> (M = Ni, Co, Cu) were investigated using ultraviolet photoelectron spectroscopy (UPS, AXIS-Nova; monochromatic He 1 = 21.2 eV, Ag 3d<sub>5/2</sub> < 100 meV) and UV-vis spectroscopy.

### *PEC measurements*

PEC water splitting was conducted in a 0.1 M Na<sub>2</sub>SO<sub>3</sub> and 0.1 M Na<sub>2</sub>SO<sub>4</sub> solution using a three-electrode electrochemical system (Ivium Technologies) equipped with BiVO<sub>4</sub>/M<sub>3</sub>(HHTP)<sub>2</sub> (M = Ni, Co, Cu) as the working electrode, a Pt mesh as the counter electrode, and Ag/AgCl/saturated NaCl as the reference electrode. A filter with the standard solar radiation of air mass (AM) 1.5 G was installed in the solar simulator, which was calibrated to 1 sun (100 mW/cm<sup>2</sup>). The photoanodic performance was measured in the dark and under illumination using linear sweep voltammetry (LSV) at a scan rate of 20 mVs<sup>-1</sup>. The measured potential vs. Ag/AgCl was converted to RHE using the Nernst equation:

$$E_{RHE} = E_{Ag/AgCl} + E_{Ag/AgCl}^0 + 0.059 * pH, \quad (1)$$

where E<sub>RHE</sub> is the converted potential vs. RHE, E<sub>Ag/AgCl</sub><sup>0</sup> = 0.1976 V, and E<sub>Ag/AgCl</sub> is the measured potential vs. RHE and the Ag/AgCl reference. The IPCE was measured at an applied voltage of 1.23 V

vs. RHE under the irradiation source and monochromator (MonoRa150). The intensity at each wavelength was measured using a calibrated Si photodiode. The IPCE was calculated using the following equation:

$$IPCE (\%) = \frac{I_{ph} (mA \text{ cm}^{-2}) \times 1239.8 (V \text{ nm})}{P_{mono} (mW \text{ cm}^{-2}) \times \lambda (nm)} \times 100 \quad (2)$$

where  $I_{ph}$  is the measured photocurrent density,  $\lambda$  is the wavelength of the incident light, and  $P_{mono}$  is the power intensity of the incident light at each wavelength. The IPCE considers three main factors: the light absorption efficiency ( $\eta_{abs}$ ), charge separation efficiency ( $\eta_{sep}$ ), and charge transfer efficiency ( $\eta_{trans}$ ).

$$IPCE (\lambda) = \eta_{abs} \times \eta_{sep} \times \eta_{trans} \quad (3)$$

Electrochemical impedance spectroscopy (EIS) was performed in the frequency range of 100 kHz to 1 Hz with an applied voltage of 1.23 V vs. RHE. The EIS curves were fitted and analyzed to obtain the series resistance ( $R_s$ ,  $\Omega \text{ cm}^2$ ) and charge transfer resistance at the interface between the electrode and the electrolyte ( $R_{ct}$ ,  $\Omega \text{ cm}^2$ ). The product of the light-absorption and charge separation efficiencies ( $\eta_{abs} \times \eta_{sep}$ ) and value of  $\eta_{trans}$  were obtained in 0.1 M  $\text{Na}_2\text{SO}_3$  solution as a fast hole scavenger.

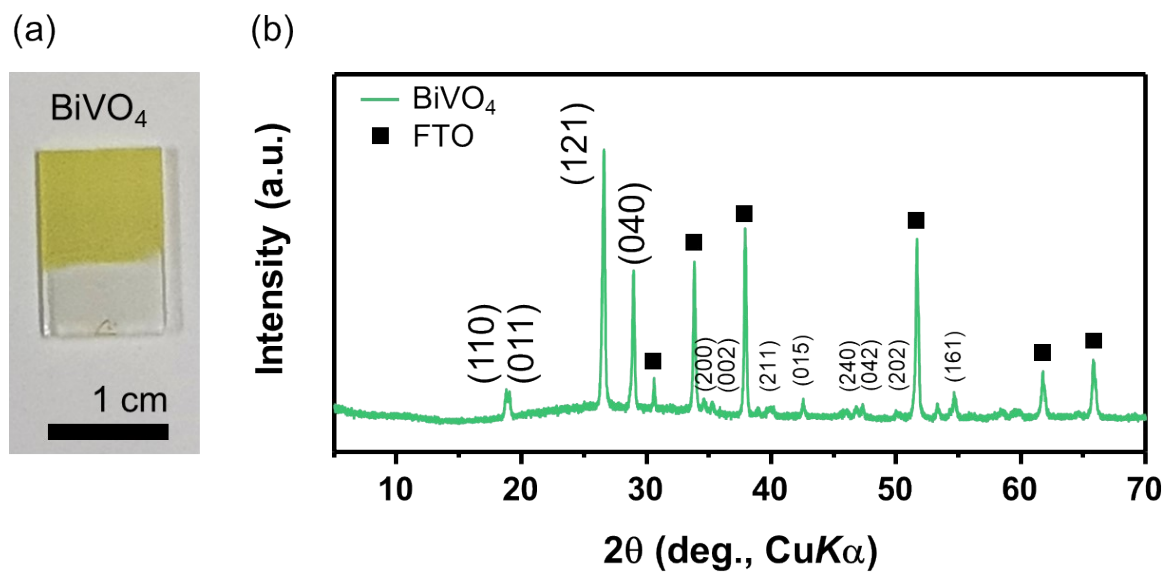

**Fig. S1.** (a) Photograph of BiVO<sub>4</sub>/FTO/glass substrate. (b) XRD patterns of electrodeposited BiVO<sub>4</sub> on FTO/glass substrate.

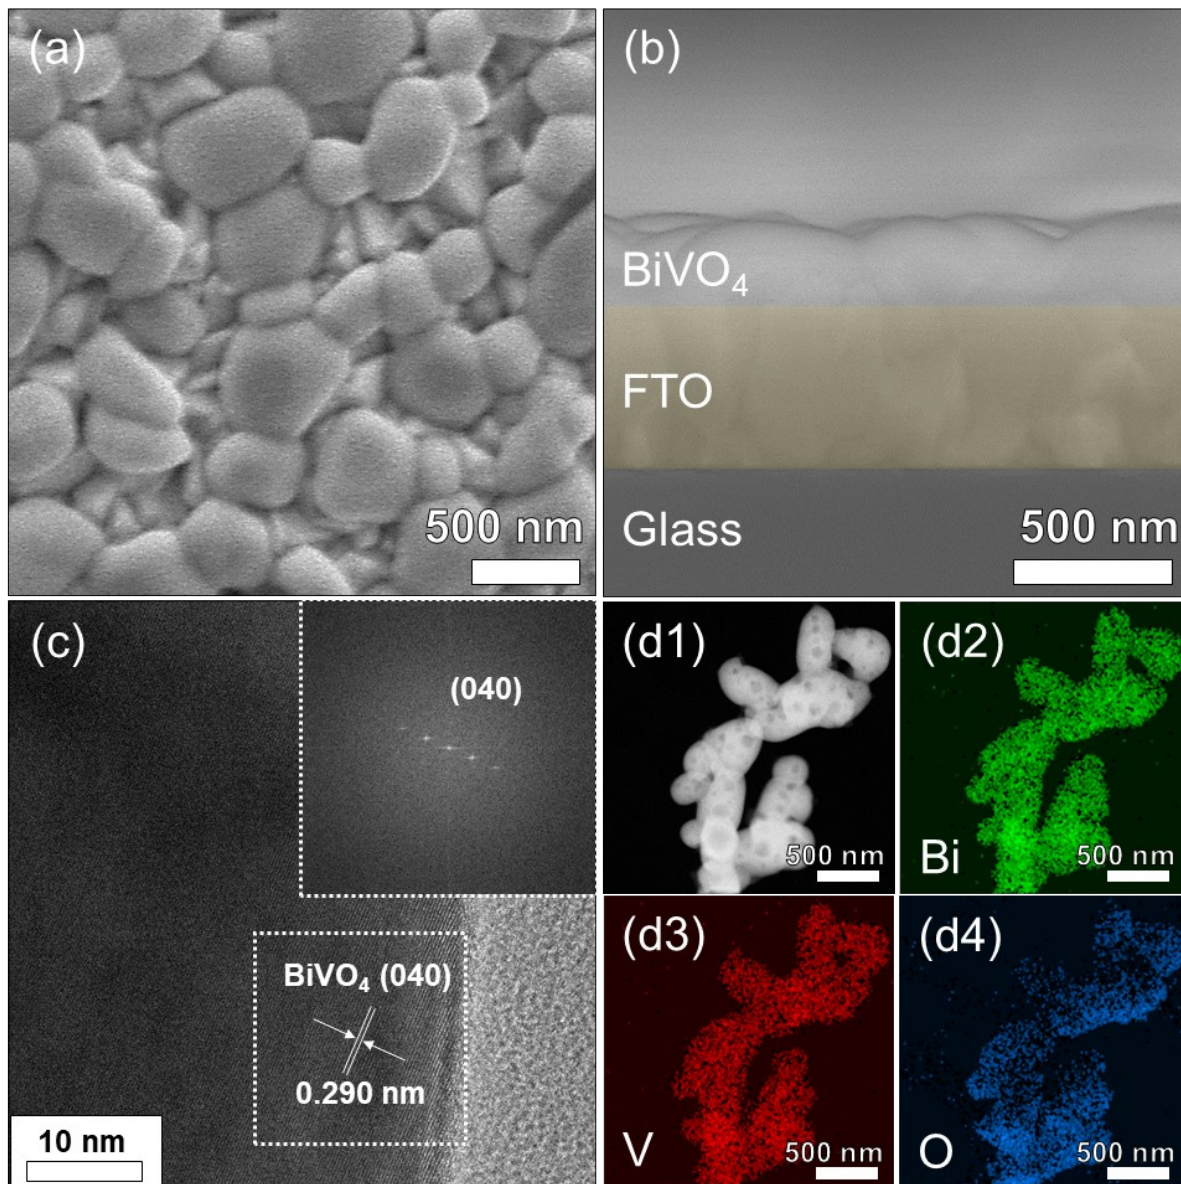

**Fig. S2.** (a) Top-view and (b) cross-sectional view SEM image of BiVO<sub>4</sub> thin film. (c) HR-TEM image of BiVO<sub>4</sub> (inset: SAED patterns). Elemental mappings of (d1) BiVO<sub>4</sub>, (d2) Bi, (d3) V, and (d4) O.

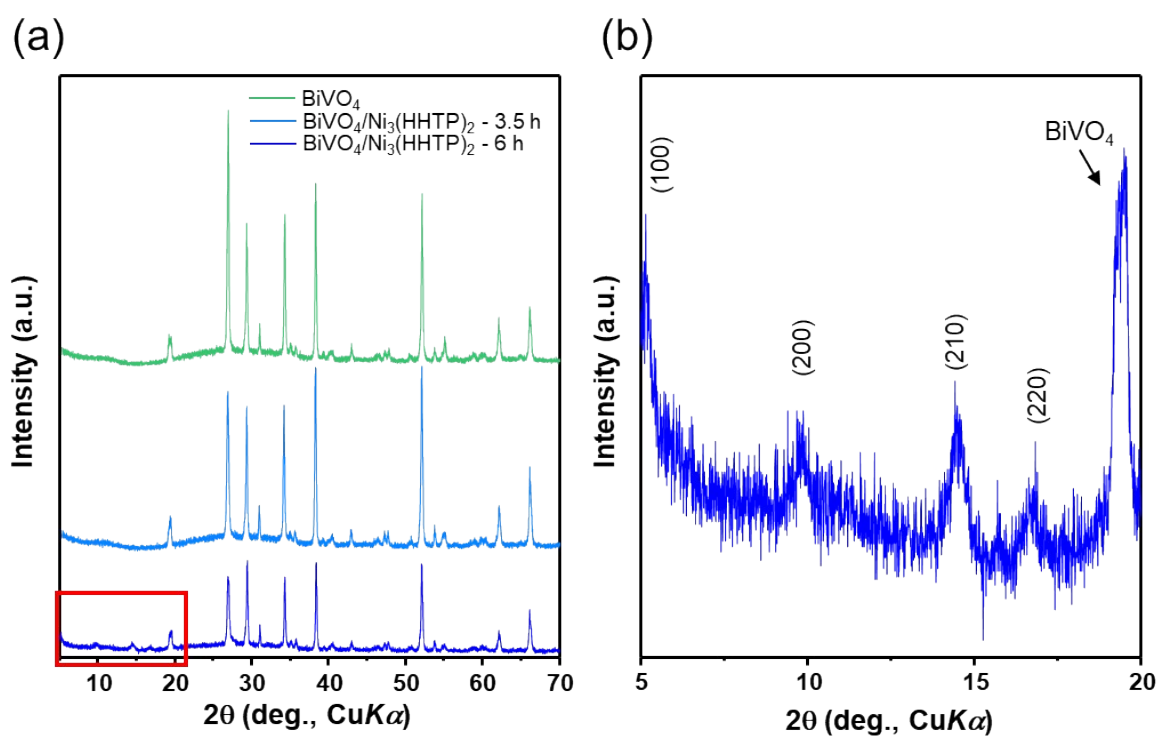

**Fig. S3.** (a) XRD patterns of  $\text{BiVO}_4$  and  $\text{BiVO}_4/\text{Ni}_3(\text{HHTP})_2$  heterostructure (solvothermal 3.5 h and 6 h). (b) Close examination of XRD peaks at  $2\theta=5\sim 20^\circ$  of  $\text{BiVO}_4/\text{Ni}_3(\text{HHTP})_2$  (solvothermal 6 h).

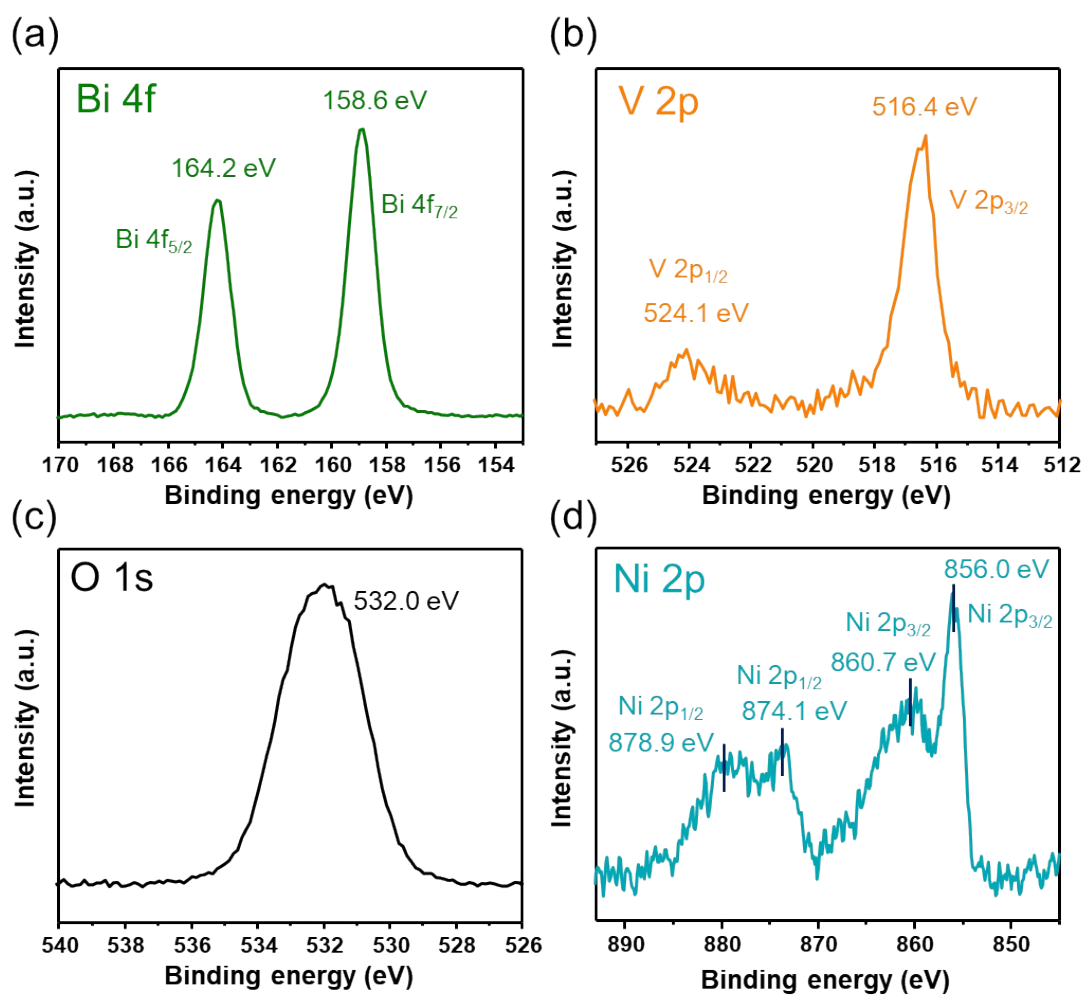

**Fig. S4.** XPS of (a) Bi 4f, (b) V 2p, (c) O 1s, and (d) Ni 2p in BiVO<sub>4</sub>/Ni<sub>3</sub>(HHTP)<sub>2</sub> heterostructure.

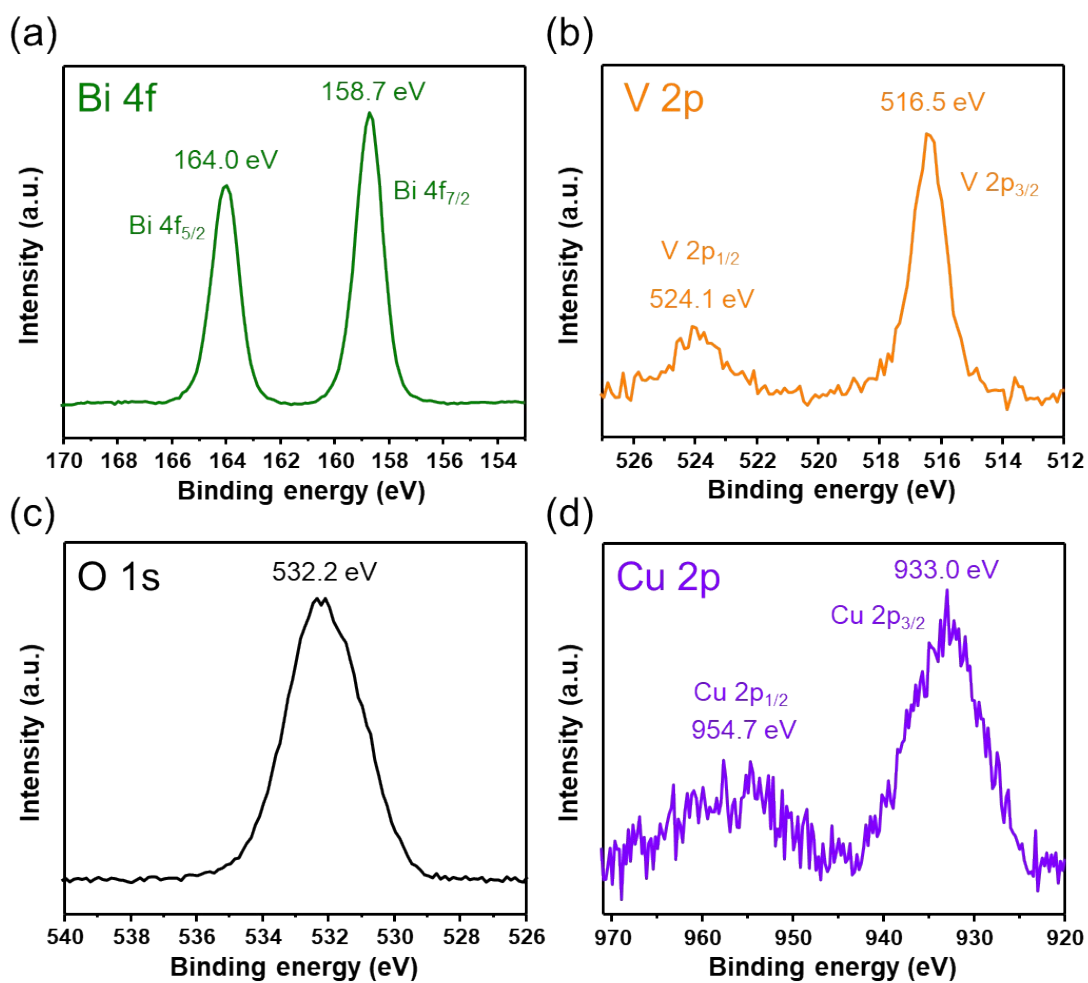

**Fig. S5.** XPS of (a) Bi 4f, (b) V 2p, (c) O 1s, and (d) Cu 2p in BiVO<sub>4</sub>/Cu<sub>3</sub>(HHTP)<sub>2</sub> heterostructure.



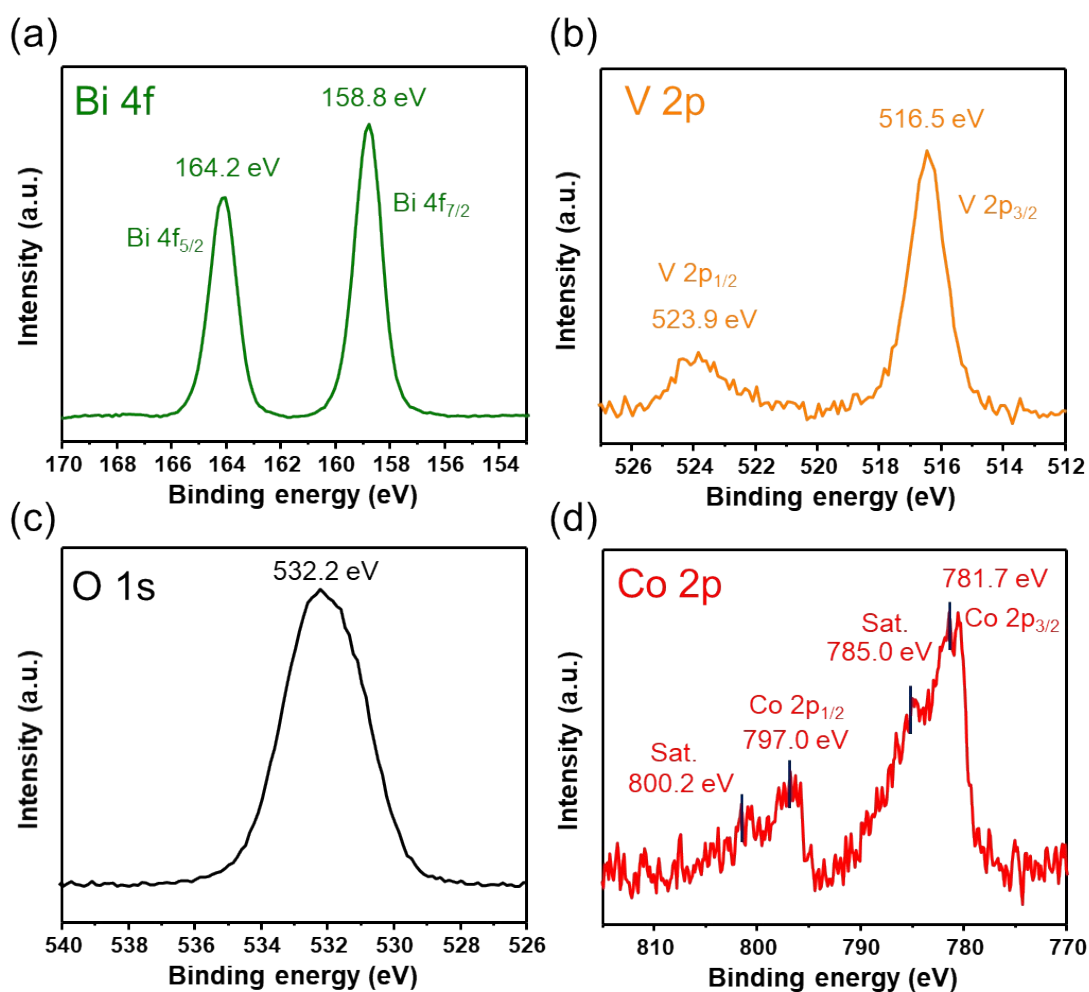

**Fig. S6.** XPS of (a) Bi 4f, (b) V 2p, (c) O 1s, and (d) Cu 2p in BiVO<sub>4</sub>/Co<sub>3</sub>(HHTP)<sub>2</sub> heterostructure.

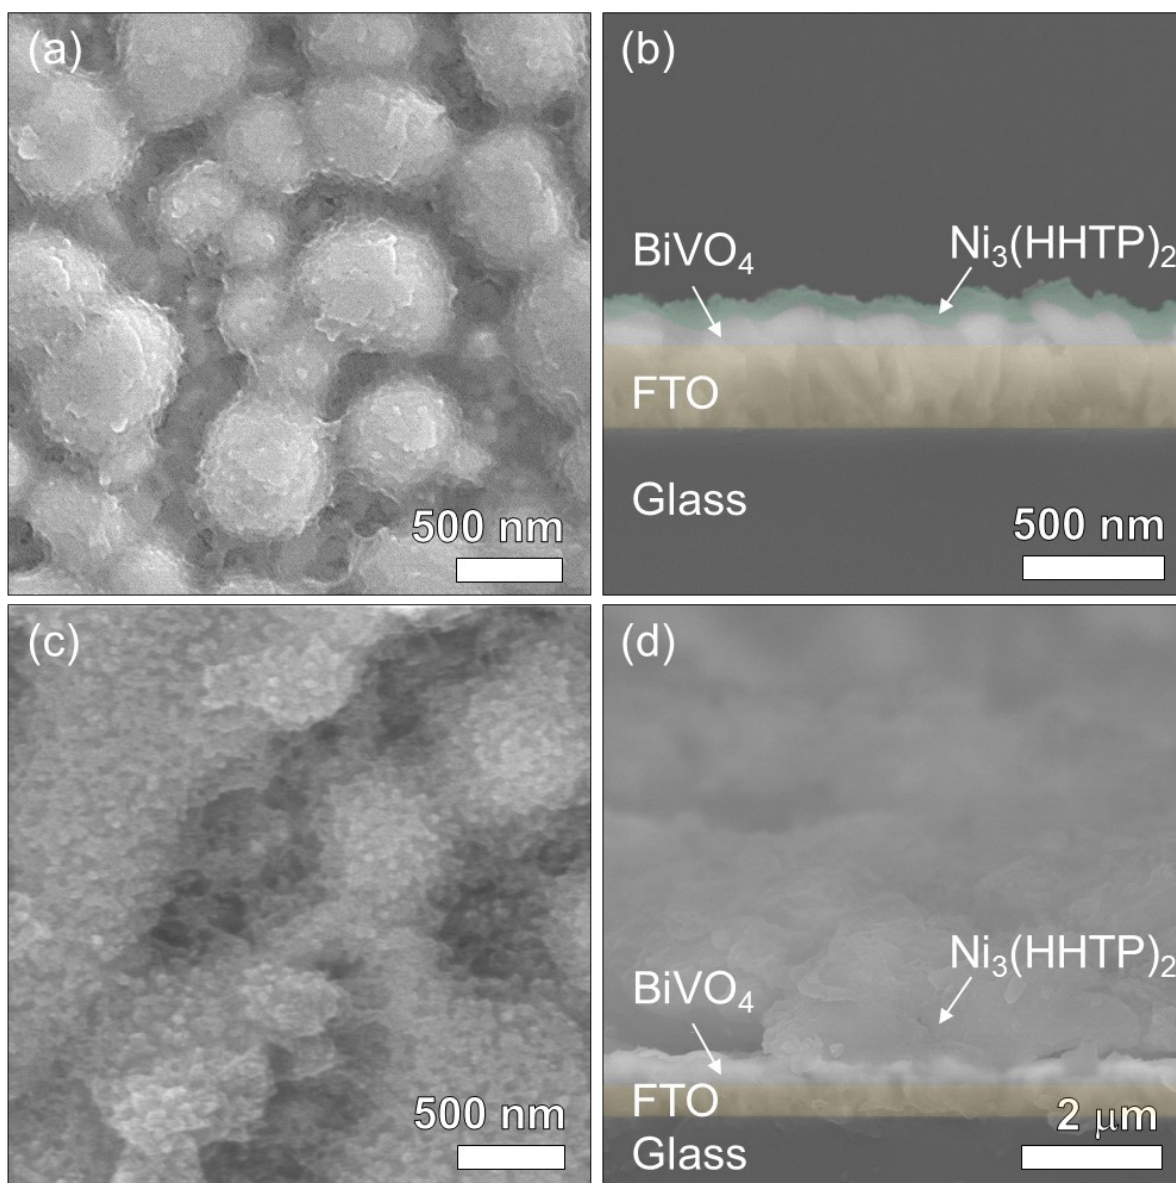

**Fig. S7.** (a) Top-view and (b) cross-sectional view SEM image of  $\text{BiVO}_4/\text{Ni}_3(\text{HHTP})_2$  heterostructure (solvothermal 1 h). (c) Top-view and (d) cross-sectional view SEM image of  $\text{BiVO}_4/\text{Ni}_3(\text{HHTP})_2$  heterostructure (solvothermal 6 h).

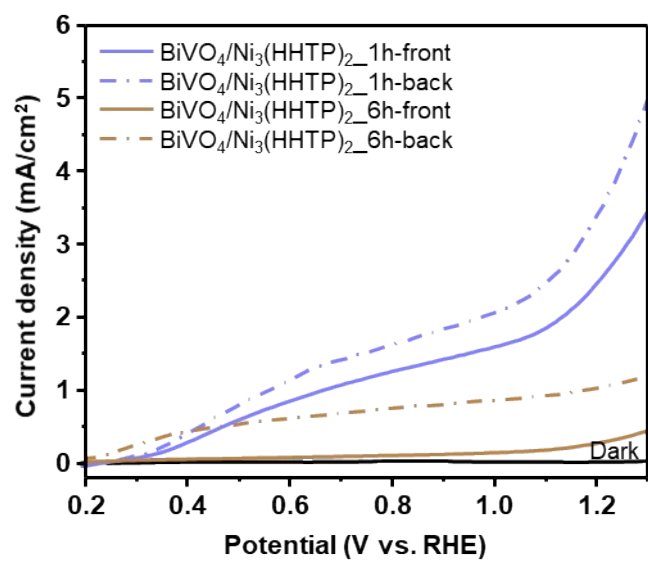

**Fig. S8.** *J-V* curves of  $\text{BiVO}_4/\text{Ni}_3(\text{HHTP})_2$  (solvothermal 1 h and 6 h) heterostructure in a 0.1 M  $\text{Na}_2\text{SO}_3$ .

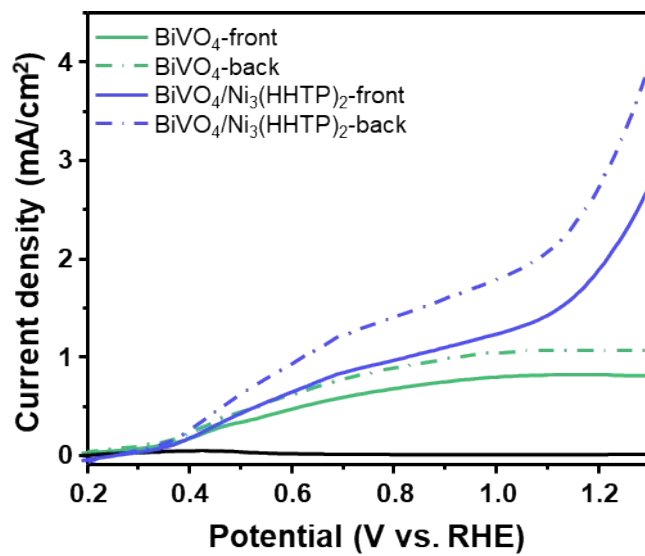

**Fig. S9.** (a) J-V curves of BiVO<sub>4</sub> and BiVO<sub>4</sub>/Ni<sub>3</sub>(HHTP)<sub>2</sub> in a 1 M Na<sub>2</sub>SO<sub>4</sub> electrolyte (without hole scavenging Na<sub>2</sub>SO<sub>3</sub>). (b) Mott-Schottky plots of BiVO<sub>4</sub> and BiVO<sub>4</sub>/Ni<sub>3</sub>(HHTP)<sub>2</sub> at 100 Hz.

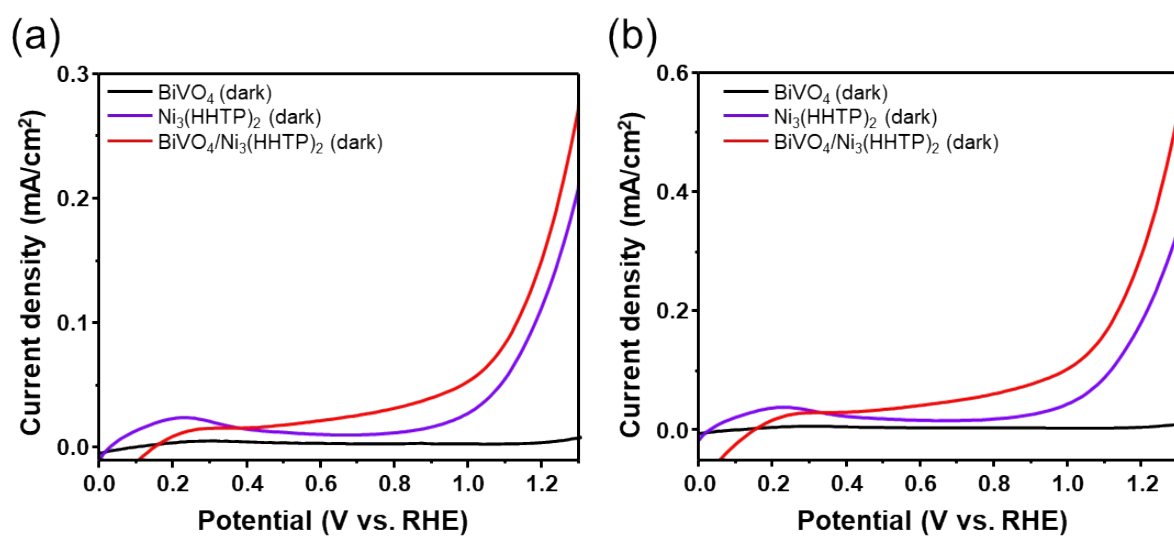

**Fig. S10.** (a) J-V curves of BiVO<sub>4</sub>, Ni<sub>3</sub>(HHTP)<sub>2</sub> and BiVO<sub>4</sub>/Ni<sub>3</sub>(HHTP)<sub>2</sub> in dark (0.1 M Na<sub>2</sub>SO<sub>4</sub> electrolyte). (b) J-V curves of BiVO<sub>4</sub>, Ni<sub>3</sub>(HHTP)<sub>2</sub> and BiVO<sub>4</sub>/Ni<sub>3</sub>(HHTP)<sub>2</sub> in dark (0.1 M Na<sub>2</sub>SO<sub>3</sub> electrolyte).

**Table S1.** Photocurrent densities of BiVO<sub>4</sub>/MOF heterostructures at 1.23 V in the literatures and the present work. [S1-S7]

| Photoanode                                             | $J_{sulfite}$<br>@ 1.23 V (mA/cm <sup>2</sup> ) | $J_{water}$<br>@ 1.23 V (mA/cm <sup>2</sup> ) | Ref       |
|--------------------------------------------------------|-------------------------------------------------|-----------------------------------------------|-----------|
| BiVO <sub>4</sub> /Ni <sub>3</sub> (HHTP) <sub>2</sub> | 4.66                                            | 3.10                                          | This work |
| BiVO <sub>4</sub> /Bi-MOF                              | 3.21                                            | 2.35                                          | [S1]      |
| Fe-doped BiVO <sub>4</sub> /MIL-53(Fe)                 | -                                               | 1.15                                          | [S2]      |
| BiVO <sub>4</sub> /MIL-101(Fe)                         | -                                               | 2.59                                          | [S3]      |
| BiVO <sub>4</sub> /Co-Ni-MOF                           | -                                               | 3.20                                          | [S4]      |
| BiVO <sub>4</sub> @Co-MIm                              | -                                               | 3.16                                          | [S5]      |
| BiVO <sub>4</sub> /Co-MOF                              | -                                               | 3.10                                          | [S6]      |
| Fe/W-doped BiVO <sub>4</sub> /MIL-100(Fe)              | -                                               | 2.76                                          | [S7]      |

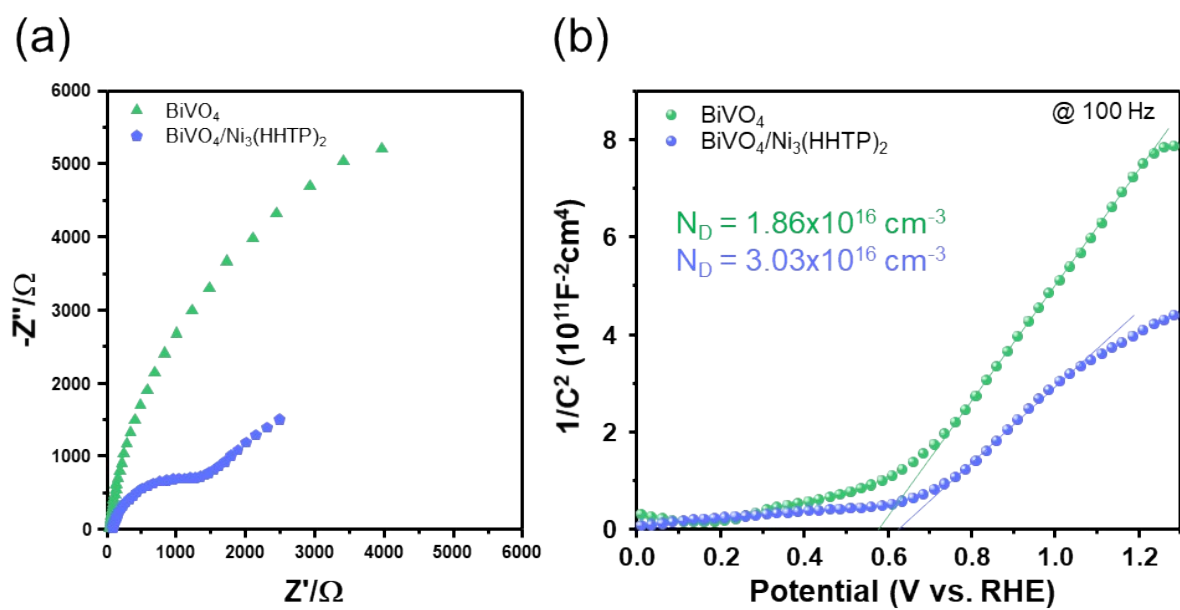

**Fig. S11.** (a) EIS analysis for  $\text{BiVO}_4$  and  $\text{BiVO}_4/\text{Ni}_3(\text{HHTP})_2$  at 0V in dark. (b) Mott-Schottky plots of  $\text{BiVO}_4$  and  $\text{BiVO}_4/\text{Ni}_3(\text{HHTP})_2$  at 100 Hz.

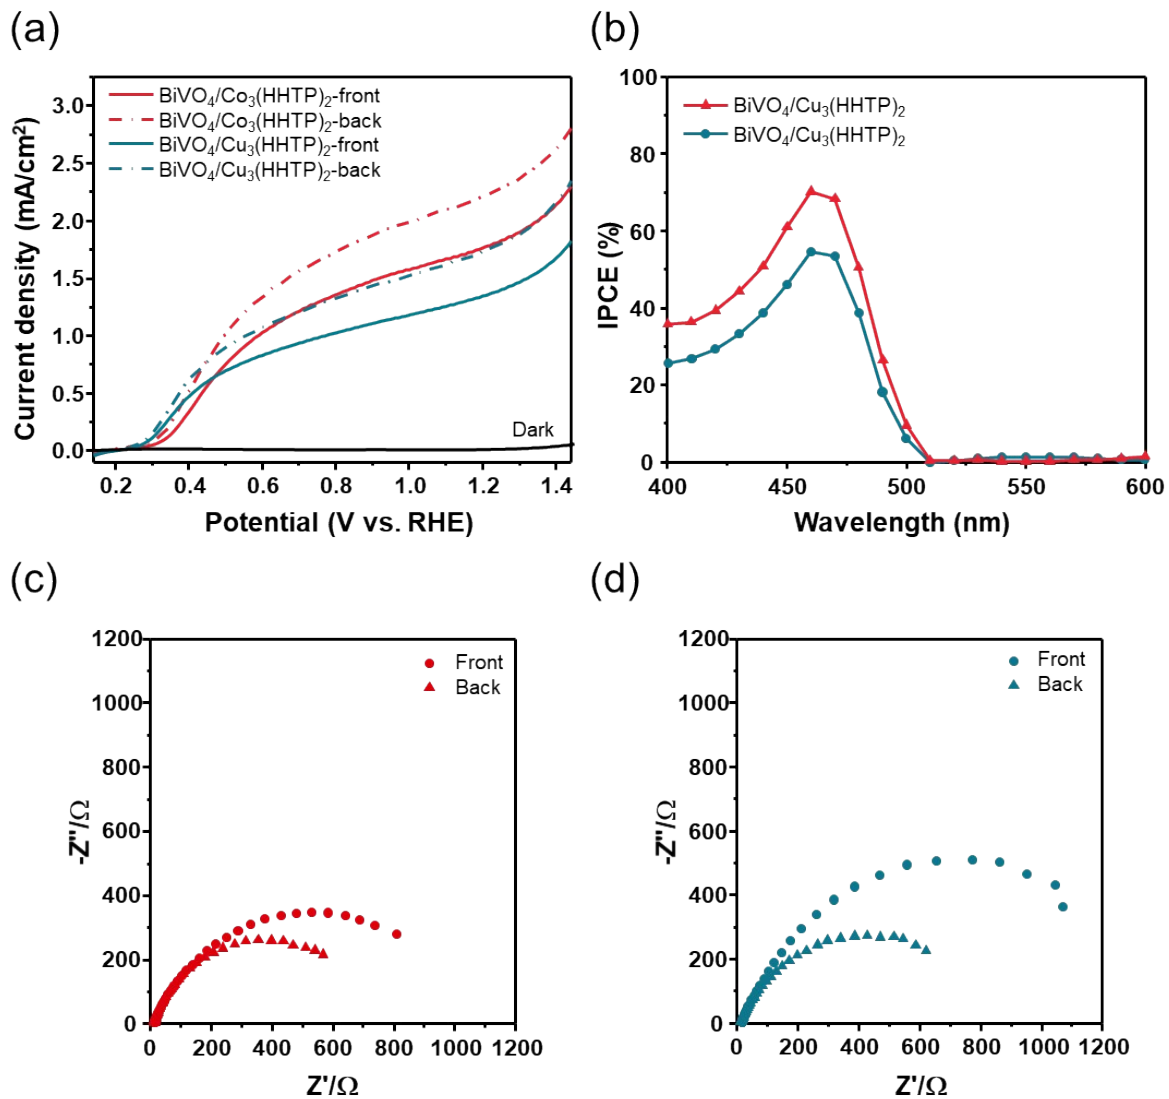

**Fig. S12.** (a) J-V curves of BiVO<sub>4</sub>/Co<sub>3</sub>(HHTP)<sub>2</sub> and BiVO<sub>4</sub>/Cu<sub>3</sub>(HHTP)<sub>2</sub> (front and back illumination) in a 0.1 M Na<sub>2</sub>SO<sub>3</sub> electrolyte. (b) IPCE of BiVO<sub>4</sub>/Co<sub>3</sub>(HHTP)<sub>2</sub> and BiVO<sub>4</sub>/Cu<sub>3</sub>(HHTP)<sub>2</sub>. EIS analysis of (c) BiVO<sub>4</sub>/Co<sub>3</sub>(HHTP)<sub>2</sub> and (d) BiVO<sub>4</sub>/Cu<sub>3</sub>(HHTP)<sub>2</sub> (front and back illumination).



**Table S2.** Fitted charge transfer resistance.

| Photoanode                    | $R_s$ ( $W \cdot cm^2$ ) | $R_{ct}$ ( $W \cdot cm^2$ ) |
|-------------------------------|--------------------------|-----------------------------|
| $BiVO_4/Co_3(HHTP)_2$ (front) | 11.9                     | 1124.8                      |
| $BiVO_4/Co_3(HHTP)_2$ (back)  | 9.8                      | 743.6                       |
| $BiVO_4/Cu_3(HHTP)_2$ (front) | 10.5                     | 1408.3                      |
| $BiVO_4/Cu_3(HHTP)_2$ (back)  | 11.4                     | 803.2                       |

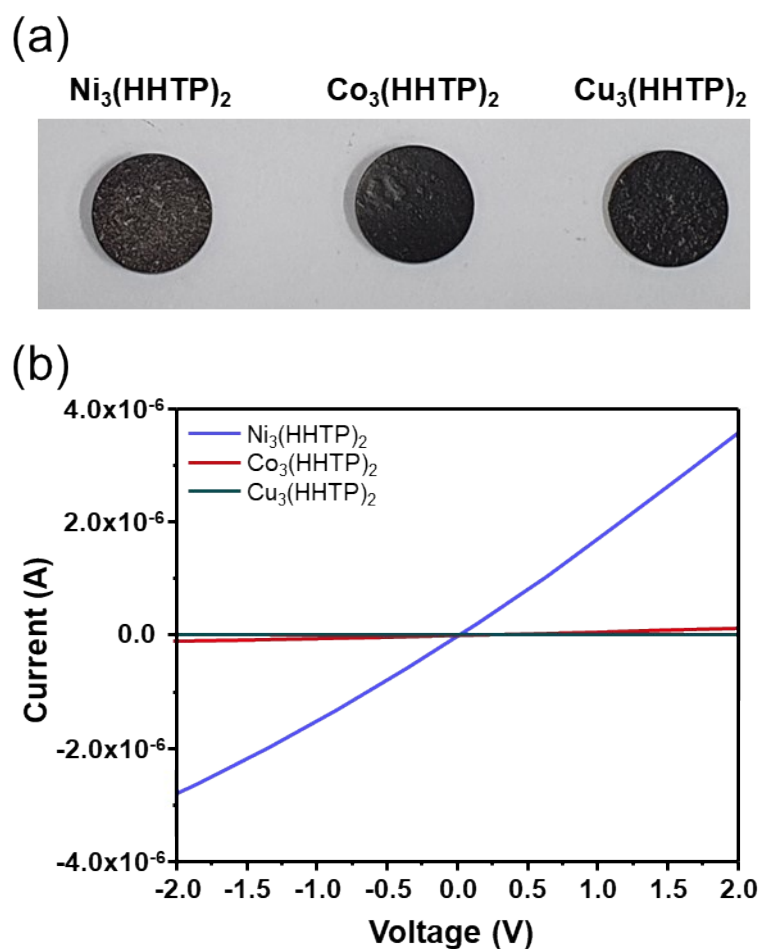

**Fig. S13.** (a) Pellets of  $\text{Ni}_3(\text{HHTP})_2$ ,  $\text{Co}_3(\text{HHTP})_2$ , and  $\text{Cu}_3(\text{HHTP})_2$ . (b) I-V curves of  $\text{Ni}_3(\text{HHTP})_2$ ,  $\text{Co}_3(\text{HHTP})_2$ , and  $\text{Cu}_3(\text{HHTP})_2$  pellets. Electrical measurements of HHTP-based MOFs are performed using two-electrode in air at a constant temperature of 297 K and in the absence of light. The electrical conductivity is calculated to be  $\sigma=4.45 \times 10^{-6} \text{ S cm}^{-1}$ ,  $\sigma=1.59 \times 10^{-7} \text{ S cm}^{-1}$ ,  $\sigma=4.29 \times 10^{-8} \text{ S cm}^{-1}$  for  $\text{Ni}_3(\text{HHTP})_2$ ,  $\text{Co}_3(\text{HHTP})_2$ , and  $\text{Cu}_3(\text{HHTP})_2$ , respectively. ( $\sigma = L/(R \times \pi(d/2)^2)$ ),  $L = 2.0 \text{ mm}$ ,  $d = 3.0 \text{ mm}$ ,  $R_{\text{Ni}_3(\text{HHTP})_2} = 6.35 \times 10^5 \Omega$ ,  $R_{\text{Co}_3(\text{HHTP})_2} = 1.78 \times 10^7 \Omega$ ,  $R_{\text{Cu}_3(\text{HHTP})_2} = 6.59 \times 10^7 \Omega$ )

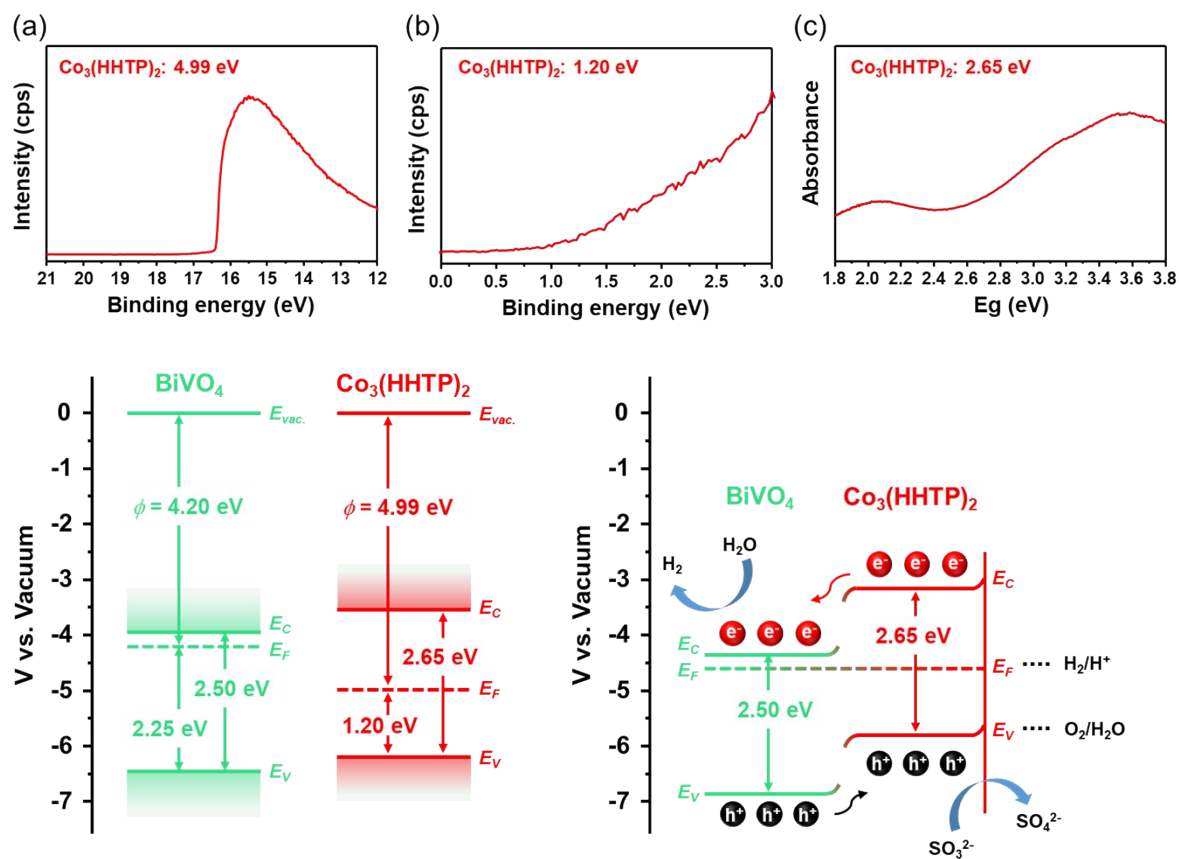

**Fig. S14.** UPS spectra of  $\text{BiVO}_4$  and  $\text{BiVO}_4/\text{Co}_3(\text{HHTP})_2$  for obtaining (a) work function ( $\phi$ ) and valence band maximum. (c) UV-vis spectra of  $\text{BiVO}_4$  and  $\text{BiVO}_4/\text{Co}_3(\text{HHTP})_2$ . Schematic energy band diagram of  $\text{BiVO}_4$  and  $\text{BiVO}_4/\text{Co}_3(\text{HHTP})_2$  (d) before contact and (e) after contact.

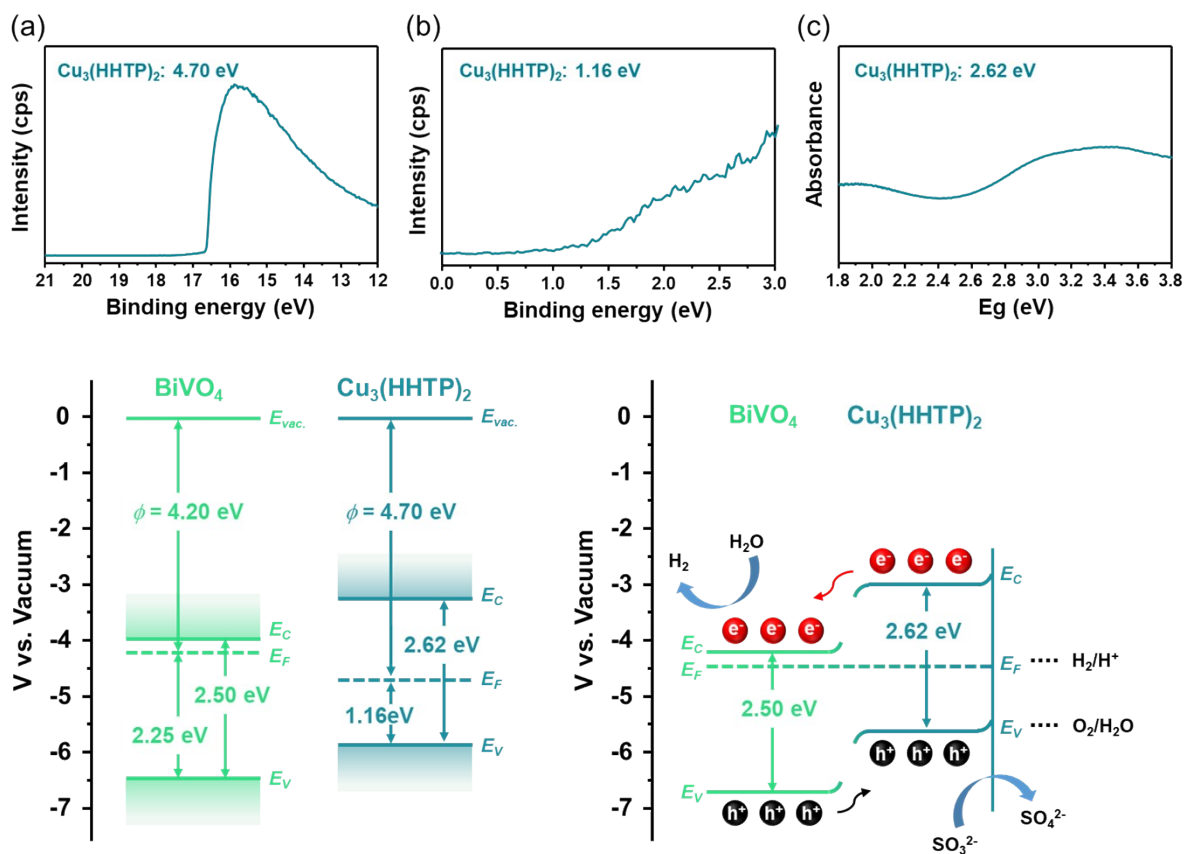

**Fig. S15.** UPS spectra of  $\text{BiVO}_4$  and  $\text{BiVO}_4/\text{Cu}_3(\text{HHTP})_2$  for obtaining (a) work function ( $\phi$ ) and valence band maximum. (c) UV-vis spectra of  $\text{BiVO}_4$  and  $\text{BiVO}_4/\text{Cu}_3(\text{HHTP})_2$ . Schematic energy band diagram of  $\text{BiVO}_4$  and  $\text{BiVO}_4/\text{Cu}_3(\text{HHTP})_2$  (d) before contact and (e) after contact.

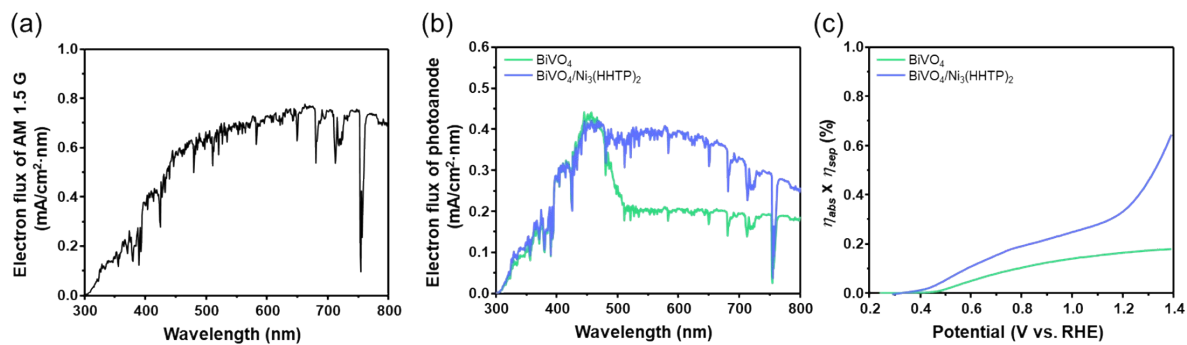

**Fig. S16.** (a) Electron flux of AM 1.5 G solar spectrum. (b) Electron flux of BiVO<sub>4</sub> and BiVO<sub>4</sub>/Ni<sub>3</sub>(HHTP)<sub>2</sub>. The electron flux of the photoanode is the product of AM 1.5 G electron flux and LHE (%). (c)  $\eta_{abs} \times \eta_{sep}$  of BiVO<sub>4</sub> and BiVO<sub>4</sub>/Ni<sub>3</sub>(HHTP)<sub>2</sub>.

**Table S3.** Light absorption wavelength,  $J_{max}$ ,  $J_{abs}$ , and  $\eta_{abs}$  of BiVO<sub>4</sub> and BiVO<sub>4</sub>/Ni<sub>3</sub>(HHTP)<sub>2</sub>.

| <b>Photoanode</b>                                      | <b>Light absorption wavelength (nm)</b> | <b><math>J_{max}</math> (mA/cm<sup>2</sup>)</b> | <b><math>J_{abs}</math> (mA/cm<sup>2</sup>)</b> | <b><math>\eta_{abs}</math> (%)</b> |
|--------------------------------------------------------|-----------------------------------------|-------------------------------------------------|-------------------------------------------------|------------------------------------|
| BiVO <sub>4</sub>                                      | 496                                     | 6.44                                            | 4.42                                            | 68.6                               |
| BiVO <sub>4</sub> /Ni <sub>3</sub> (HHTP) <sub>2</sub> | 504                                     | 6.95                                            | 4.89                                            | 70.4                               |

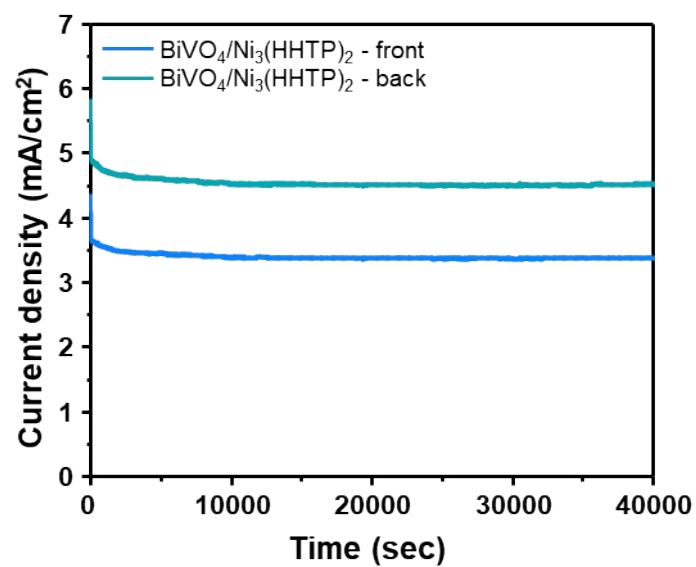

**Fig. S17.** The chronopotentiometry curve of BiVO<sub>4</sub>/Ni<sub>3</sub>(HHTP)<sub>2</sub> in a 0.1 M Na<sub>2</sub>SO<sub>3</sub> electrolyte at 1.23 V vs. RHE under front and back illumination.

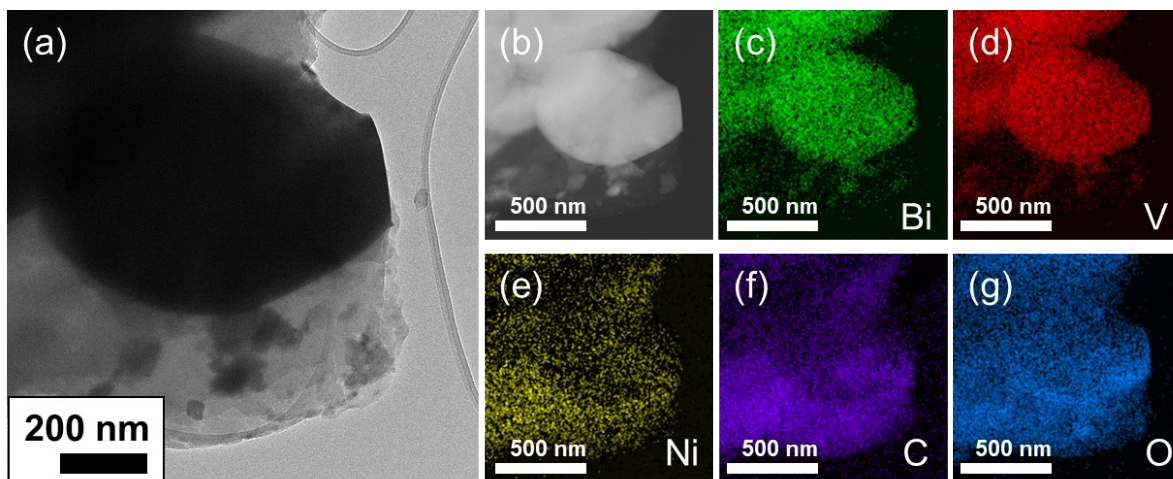

**Fig. S18.** (a) TEM image and (b-g) elemental mappings of  $\text{BiVO}_4/\text{Ni}_3(\text{HHTP})_2$  heterostructure after photoelectrochemical reaction.



## Reference

- [S1] S. Kim, T.A.D. Pena, S. Seo, H. Choi, J. Park, J.H. Lee, J. Woo, C.H. Choi, S. Lee, *Appl. Surf. Sci.*, 2021, **563**, 150357.
- [S2] G.X. Liu, Y.P. Li, Y. Xiao, D.M. Jia, C.H. Li, J.J. Zheng, X.W. Liu, *Catal. Lett.*, 2019, **149**, 870-875.
- [S3] C.H. Liu, H. Luo, Y. Xu, Z.H. Zhang, Q. Liang, W.C. Wang, Z.D. Chen, *Chem. Eng. J.*, 2020, **384**, 123333.
- [S4] S.Q. Zhou, K.Y. Chen, J.W. Huang, L. Wang, M.Y. Zhang, B. Bai, H. Liu, Q.Z. Wang, *Appl. Catal. B*, 2020, **266**, 118513.
- [S5] S.Q. Zhou, P.F. Yue, J.W. Huang, L. Wang, H.D. She, Q.Z. Wang, *Chem. Eng. J.*, 2019, **371**, 885-892.
- [S6] W. Zhang, R. Li, X. Zhao, Z. Chen, A.W.K. Law, K. Zhou, *Chemosuschem*, 2018, **11**, 2710-2716.
- [S7] Z.B. Jiao, J.J. Zheng, C.C. Feng, Z.L. Wang, X.S. Wang, G.X. Lu, Y.P. Bi, *Chemosuschem*, 2016, **9**, 2824-2831.
